# Supplementary material for: Surface chemistry of water-dispersed detonation nanodiamonds modified by atmospheric DC plasma afterglow
Source: Royal Society of Chemistry journal article supplement (doi:10.1039/c7ra04167e), 2017-01-01
Supplement: c7ra04167e1.pdf [file c7ra04167e1.pdf]

**Electronic supplementary information**

**Surface chemistry of water-dispersed detonation  
nanodiamonds modified by atmospheric DC plasma  
afterglow**

**Pavla Stenclova,<sup>\*a</sup> Vladyslava Celedova,<sup>b</sup> Anna Artemenko,<sup>a</sup> Vit Jirasek,<sup>a</sup> Jaroslav  
Jira,<sup>a,b</sup> Bohuslav Rezek,<sup>b</sup> and Alexander Kromka<sup>a</sup>**

<sup>a</sup> *Institute of Physics, Academy of Sciences of the Czech Republic, Cukrovarnicka 10,  
162 00 Prague 6, Czech Republic.*

<sup>b</sup> *Faculty of Electrical Engineering, Czech Technical University in Prague, Technicka  
2, 166 27 Prague, Czech Republic*

*E-mail: stenclova@fzu.cz*

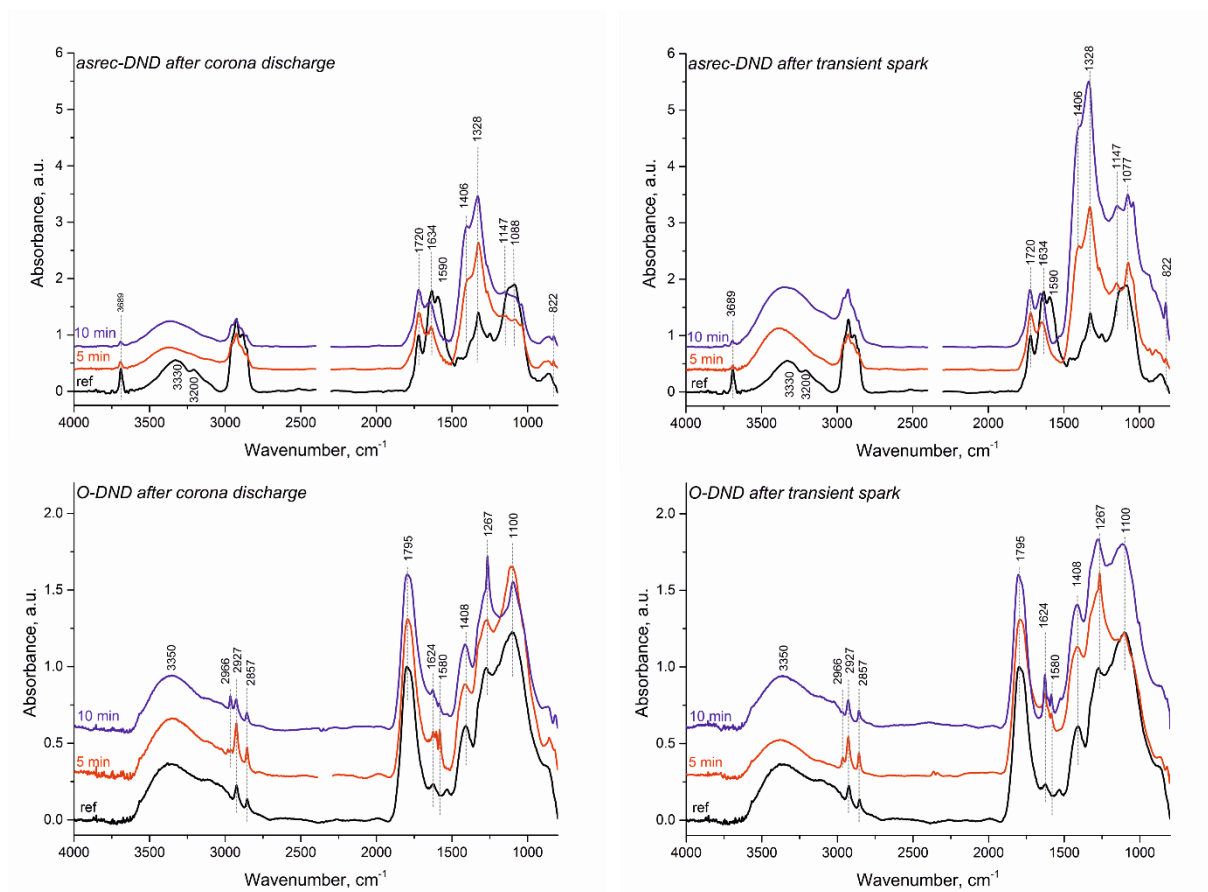

**Fig. S1.** FTIR spectra of asrec-DND and O-DND samples treated by corona and transient spark discharge afterglow. The spectra are obtained before drying in vacuum, samples were dried only on a hotplate prior to FTIR measurement. The spectra are normalized at carbonyl peak at 1720  $\text{cm}^{-1}$  (1795  $\text{cm}^{-1}$  for O-DND, respectively), which is stable in XPS. The spectra are stacked in the graphs for better clarity.

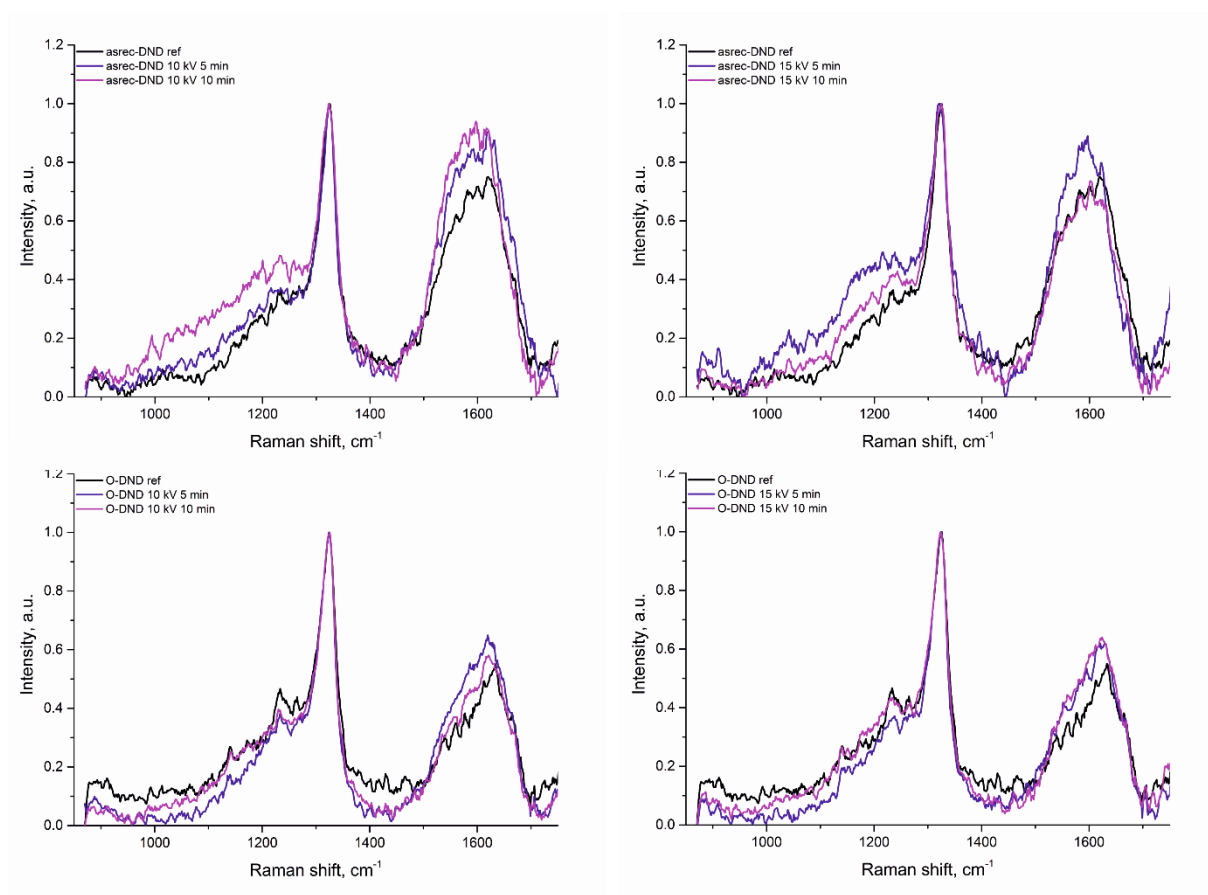

**Fig. S2.** Raman spectra of presented materials. Spectra are normalized at a D-peak centered at 1325 cm<sup>-1</sup>. Hardly any difference is resolvable. Modification of all treated DNDs thus occurs on their surfaces with minimal impact on their core.

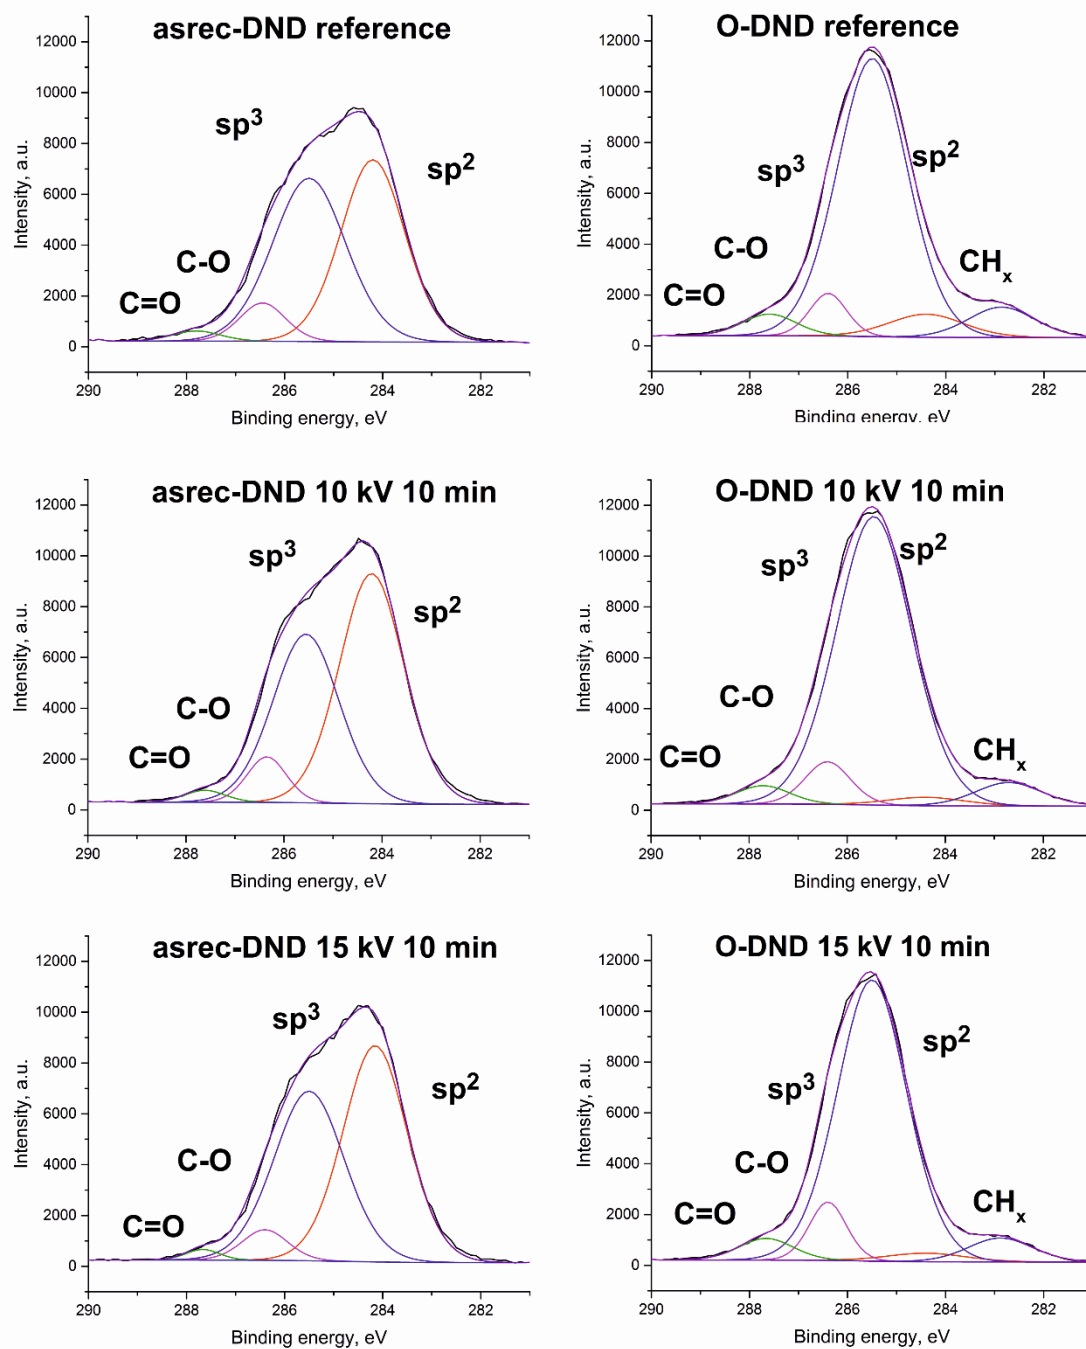

**Fig. S3.** Deconvoluted C 1s peak from XPS spectra.

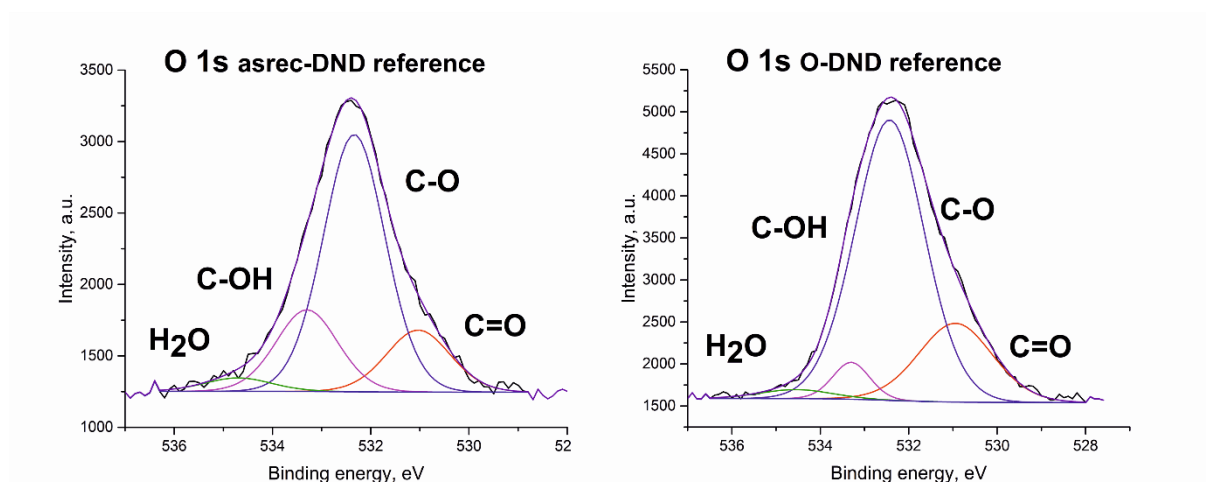

**Fig. S4.** The water contribution was estimated from deconvolution of O 1s peaks. The O 1s peaks were fitted into 4 peaks: 531.1 eV C=O, 532.3 eV C–O, 533.3 eV C–OH, and 534.7 eV O in H<sub>2</sub>O.<sup>1</sup> The results of the O 1s fits show that the samples had maximally 2% of water and that as-received DNDs with hydrogen-related groups on the surface binds more water. The amount of water and difference between as-received and oxidized DNDs is in a good agreement with thermogravimetric analysis of DNDs in our prior work.<sup>2</sup>

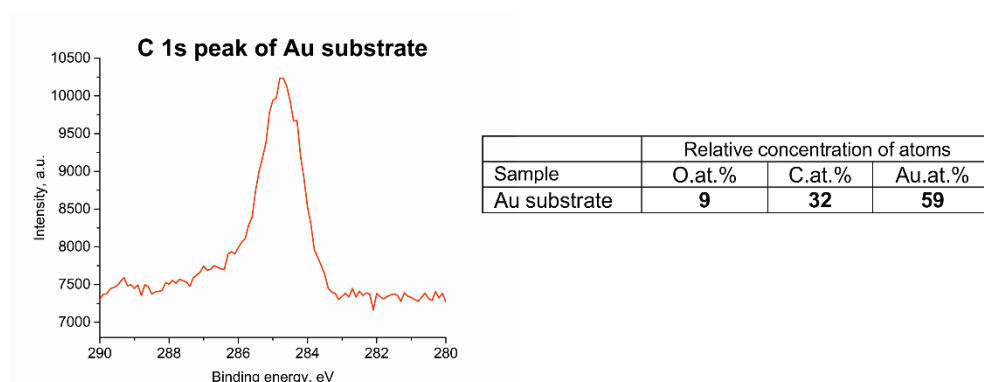

**Fig. S5.** The high resolution C 1s spectrum and chemical composition from XPS analysis on bare Au substrate evidencing some contamination by carbon but no band at 282.7 eV specific to O-DND.

## References

- 1 J. V. Rojas, M. Toro-Gonzalez, M. C. Molina-Higgins and C. E. Castano, *Mater. Sci. Eng. B*, 2016, **205**, 28–35.
- 2 S. Stehlik, T. Glatzel, V. Pichot, R. Pawlak, E. Meyer, D. Spitzer and B. Rezek, *Diam. Relat. Mater.*, 2016, **63**, 97–102.
